# Supplementary material for: miR-557 inhibits hepatocellular carcinoma progression through Wnt/β-catenin signaling pathway by targeting RAB10
Source: publisher site journal article supplement (doi:10.18632/aging.205554), 2024-02-15
Supplement: Supplementary file [file aging-v16i4-205554-supplementary-material-SD1.pdf]

## SUPPLEMENTARY TABLES

Supplementary Table 1. The sequences of siRNA and cDNA used in this study.

| Name                                | Sequence                                                                                                                                                                                                                                                                                                                                                                                                                                                                                                                                                                                                                                                          |
|-------------------------------------|-------------------------------------------------------------------------------------------------------------------------------------------------------------------------------------------------------------------------------------------------------------------------------------------------------------------------------------------------------------------------------------------------------------------------------------------------------------------------------------------------------------------------------------------------------------------------------------------------------------------------------------------------------------------|
| RAB10-shRNA                         | GCTGAAGATATCCTTCGAA                                                                                                                                                                                                                                                                                                                                                                                                                                                                                                                                                                                                                                               |
| ORF Nucleotide Sequence<br>of RAB10 | ATGGCGAAGAAGACGTACGACCTGCTTTTCAAGCTGCTCCTGATCGGGGATTCCGGAG<br>TGGGAAGACCTGCGTCCTTTTTCGTTTTTCGGATGATGCCTTCAATACTACCTTTATTT<br>CCACCATAGGAATAGACTTCAAGATCAAAACAGTTGAATTACAAGGAAAGAAGATCAA<br>GCTACAGATATGGGATACAGCAGGCCAGGAGCGATTTACACCATCACAACTCCTACT<br>ACAGAGGCGCAATGGGTATCATGCTAGTATATGACATCACCAATGGTAAAAGTTTGGAA<br>AACATCAGCAAATGGCTTAGAAAACATAGATGAGCATGCCAATGAAGATGTGGAAAGAA<br>TGTTACTAGGAAACAAGTGTGATATGGACGACAAAAGAGTTGTACCTAAAGGAAAAGG<br>AGAACAGATTGCAAGGGAGCATGGTATTAGGTTTTTTGAGACTAGTGCAAAAGCAAATA<br>TAAACATCGAAAAGGCGTTCCTCACGTTAGCTGAAGATATCCTTCGAAAGACCCCTGTA<br>AAAGAGCCCAACAGTGAAAATGTAGATATCAGCAGTGGAGGAGGCGTGACAGGCTGG<br>AAGAGCAAATGCTGCTGA |

**Supplementary Table 2. The expression and survival analysis of miR-557 predicted target genes in hepatocellular carcinoma in oncomine, ualcan, and Kaplan Meier plotter databases.**

| GeneSymbol | Expression level in oncomine | Expression level in ualcan       | Survival of ualcan database      | Survival of Kaplan–Meier plotter database |
|------------|------------------------------|----------------------------------|----------------------------------|-------------------------------------------|
| USP6NL     | P>0.05                       | P<0.05                           | P>0.05                           | P<0.05                                    |
| FST        | P>0.05                       | P<0.05                           | P>0.05                           | P>0.05                                    |
| ARID1A     | P<0.05                       | P<0.05                           | P<0.05                           | P<0.05                                    |
| KCNIP3     | P>0.05                       | P<0.05                           | P>0.05                           | P>0.05                                    |
| RAPH1      | P>0.05                       | P>0.05                           | P>0.05                           | P>0.05                                    |
| WAC        | P<0.05                       | P<0.05                           | P<0.05                           | P<0.05                                    |
| LIMS1      | P<0.05                       | P<0.05                           | P>0.05                           | P>0.05                                    |
| CALM2      | P<0.05                       | P<0.05                           | P<0.05                           | P<0.05                                    |
| MAPK8      | P>0.05                       | P<0.05                           | P>0.05                           | P>0.05                                    |
| ACSL4      | P<0.05                       | P<0.05                           | P>0.05                           | P>0.05                                    |
| HBS1L      | P>0.05                       | P<0.05                           | P>0.05                           | P>0.05                                    |
| CDC42EP3   | P>0.05                       | P<0.05                           | P>0.05                           | P<0.05                                    |
| BCL7A      | P<0.05                       | P<0.05                           | P<0.05                           | P>0.05                                    |
| ADAM19     | P>0.05                       | P<0.05                           | P>0.05                           | P<0.05                                    |
| CRIP1      | P<0.05                       | P<0.05                           | P<0.05                           | P>0.05                                    |
| YIPF6      | P<0.05                       | P<0.05                           | P>0.05                           | P>0.05                                    |
| DUSP14     | P>0.05                       | P<0.05                           | P<0.05                           | P>0.05                                    |
| CLOCK      | P<0.05                       | P<0.05                           | P>0.05                           | P>0.05                                    |
| SESN3      | P>0.05                       | P<0.05                           | P>0.05                           | P>0.05                                    |
| TMEM245    | Not found                    | gene symbols were not identified | gene symbols were not identified | The gene does not exist in database       |
| UNKL       | P>0.05                       | P<0.05                           | P<0.05                           | P<0.05                                    |
| CBX4       | P>0.05                       | P<0.05                           | P>0.05                           | P<0.05                                    |
| JAZF1      | P>0.05                       | P<0.05                           | P>0.05                           | P>0.05                                    |
| RBPJ       | P<0.05                       | P<0.05                           | P>0.05                           | P<0.05                                    |
| REEP1      | P>0.05                       | P<0.05                           | P>0.05                           | P<0.05                                    |
| BACH2      | P>0.05                       | P<0.05                           | P>0.05                           | P>0.05                                    |
| ETS1       | P>0.05                       | P>0.05                           | P>0.05                           | P<0.05                                    |
| DNAJC15    | P>0.05                       | P>0.05                           | P>0.05                           | P<0.05                                    |
| IMPAD1     | P<0.05                       | P<0.05                           | P>0.05                           | P>0.05                                    |
| ZDHHC7     | P>0.05                       | P<0.05                           | P<0.05                           | P<0.05                                    |
| RAB10      | P<0.05                       | P<0.05                           | P<0.05                           | P<0.05                                    |
| ARHGEF3    | P<0.05                       | P<0.05                           | P>0.05                           | P<0.05                                    |
| CCNT2      | P>0.05                       | P<0.05                           | P>0.05                           | P>0.05                                    |
| ZBTB5      | P<0.05                       | P<0.05                           | P>0.05                           | P>0.05                                    |
| EOGT       | Not found                    | gene symbols were not identified | gene symbols were not identified | The gene does not exist in database       |
| GTF2H1     | P<0.05                       | P<0.05                           | P<0.05                           | P<0.05                                    |
| SATB1      | P>0.05                       | P<0.05                           | P>0.05                           | P>0.05                                    |
| SEMA6A     | P>0.05                       | P<0.05                           | P<0.05                           | P<0.05                                    |
| ST8SIA3    | P>0.05                       | P<0.05                           | P>0.05                           | P>0.05                                    |
